# Supplementary material
Source: MDPI journal article supplement (https://www.mdpi.com/2073-4441/14/3/444)
Supplement: s1 [file s1]

## Supplementary Materials

### **Seasonal differences in water pollution and liver histopathology of Iberian barbel (*Luciobarbus bocagei*) and Douro nase (*Pseudochondrostoma duriense*) in an agricultural watershed**

R.M.B. Santos<sup>a,b</sup>, S.M. Monteiro<sup>a</sup>, R.M.V. Cortes<sup>a</sup>, F.A.L. Pacheco<sup>b</sup>, L.F. Sanches Fernandes<sup>a</sup>

<sup>a</sup>Centre for the Research and Technology of Agro-Environment and Biological Sciences, and Inov4Agro, Institute for Innovation, Capacity Building and Sustainability of Agri-food Production, University of Trás-os-Montes and Alto Douro, Ap. 1013, 5001-801 Vila Real, Portugal.

<sup>b</sup>Chemistry Research Centre, University of Trás-os-Montes and Alto Douro, Ap. 1013, 5001-801 Vila Real, Portugal.

**Table S1** – The analytical method, detection limit, and equipment used to determine the physicochemical parameters at the sampling points in the Vilariça River.

| Parameter                                       | Analytical method                                                      | Detection limit | Equipment                                         |
|-------------------------------------------------|------------------------------------------------------------------------|-----------------|---------------------------------------------------|
| Total suspended solids (mg/L)                   | Gravimetry                                                             | -               |                                                   |
| Nitrite (mg NO <sub>2</sub> <sup>-</sup> /L)    | Spectrophotometry, sulfanilamide method Norma AFNOR NF T 90-013 (1975) | 0.035           | uni SPEC 2 Spectrophotometer UV-VIS               |
| Nitrate (mg NO <sub>3</sub> <sup>-</sup> /L)    | Spectrophotometry method, 2,6 - dimethylphenol (NP 4338-1)             | 1.25            | uni SPEC 2 Spectrophotometer UV-VIS               |
| Phosphate (mg P <sub>2</sub> O <sub>5</sub> /L) | Ascorbic acid method                                                   | 0.23            | uni SPEC 2 Spectrophotometer UV-VIS               |
| Iron (µg Fe/L)                                  | Atomic absorption spectrophotometry:electrochemistry                   | 2.5             | UNICAM 939 AA Spectrometer Furnace UNICAM GF 90   |
| Magnesium (mg Mg/L)                             | Atomic absorption spectrophotometry employing flame                    | 0.50            | Thermo Scientific ICE 3000 Series AA Spectrometer |
| Total aluminium (µg Al/L)                       | Atomic absorption spectrophotometry:electrochemistry                   | 5               | UNICAM 939 AA Spectrometer Furnace UNICAM GF 90   |
| Lead (µg Pb/L)                                  | Atomic absorption spectrophotometry:electrochemistry                   | 5               | UNICAM 939 AA Spectrometer Furnace UNICAM GF 90   |
| Copper (µg Cu/L)                                | Atomic absorption spectrophotometry:electrochemistry                   | 5               | UNICAM 939 AA Spectrometer Furnace UNICAM GF 90   |
| Arsenic (µg As/L)                               | Atomic absorption spectrophotometry:electrochemistry                   | 10              | UNICAM 939 AA Spectrometer Furnace UNICAM GF 90   |
| Manganese (µg Mn/L)                             | Atomic absorption spectrophotometry:electrochemistry                   | 2.5             | UNICAM 939 AA Spectrometer Furnace UNICAM GF 90   |
| Zinc (µg Zn/L)                                  | Atomic absorption spectrophotometry:electrochemistry                   | 6               | UNICAM 939 AA Spectrometer Furnace UNICAM GF 90   |
| Potassium (mg K/L)                              | Atomic emission spectrophotometry                                      | 1.0             | Thermo Scientific ICE 3000 Series AA Spectrometer |
| Sodium (mg Na/L)                                | Atomic emission spectrophotometry                                      | 1.0             | Thermo Scientific ICE 3000 Series AA Spectrometer |
| Calcium (mg Ca/L)                               | Atomic absorption spectrophotometry employing flame                    | 0.50            | Thermo Scientific ICE 3000 Series AA Spectrometer |
| Cadmium (µg Cd/L)                               | Atomic absorption spectrophotometry:electrochemistry                   | 10              | UNICAM 939 AA Spectrometer Furnace UNICAM GF 90   |
| Cobalt (µg Co/L)                                | Atomic absorption spectrophotometry:electrochemistry                   | 5               | UNICAM 939 AA Spectrometer Furnace UNICAM GF 90   |
| Nickel (µg Ni/L)                                | Atomic absorption spectrophotometry:electrochemistry                   | 5               | UNICAM 939 AA Spectrometer Furnace UNICAM GF 90   |
| Chromium (µg Cr/L)                              | Atomic absorption spectrophotometry:electrochemistry                   | 2               | UNICAM 939 AA Spectrometer Furnace UNICAM GF 90   |
| Sulfates (mg SO <sub>4</sub> <sup>2-</sup> /L)  | Turbidimetric method                                                   | 5.0             | uni SPEC 2 Spectrophotometer UV-VIS               |

**Table S2** - The five classifications of surface water bodies for multiple uses according to Pereira [30], Rodrigues et al. [31], and SNIRH [32].

| Parameter                                            | Class           |                     |              |                   |                        | Source    |
|------------------------------------------------------|-----------------|---------------------|--------------|-------------------|------------------------|-----------|
|                                                      | A - no polluted | B - weakly polluted | C - polluted | D - very polluted | E - extremely polluted |           |
| pH (Sorensen scale)                                  | 6.5–8.5         | 5.5–9               | 5–10         | 4.5–11            | >11                    | SNIRH     |
| Temperature (°C)                                     | ≤ 20            | 25                  | 28           | 30                | > 30                   | Pereira   |
| Conductivity (µS/cm,20°C)                            | ≤ 750           | 1 000               | 1 500        | 3 000             | >3 000                 | SNIRH     |
| Total Suspended Solids (mg/L)                        | ≤ 25            | 30                  | 40           | 80                | > 80                   | SNIRH     |
| Dissolved oxygen (lab O <sub>2</sub> %)              | ≥ 90            | 70                  | 50           | 30                | < 30                   | SNIRH     |
| Biochemical oxygen demand (mg O <sub>2</sub> /L)     | ≤ 3             | 5                   | 8            | 20                | > 20                   | SNIRH     |
| Chemical oxygen deficiency (mg O <sub>2</sub> /L)    | ≤ 10            | 20                  | 40           | 80                | > 80                   | SNIRH     |
| Oxidation (mg O <sub>2</sub> /L)                     | ≤ 3             | 5                   | 10           | 25                | > 25                   | SNIRH     |
| Ammonium (mg NH <sub>4</sub> <sup>+</sup> /L)        | ≤ 0.5           | 1.5                 | 2.5          | 4                 | > 4                    | SNIRH     |
| Kjeldahl nitrogen (mg N/L)                           | ≤ 0.5           | 1                   | 2            | 3                 | > 3                    | SNIRH     |
| Nitrate (mg NO <sub>3</sub> <sup>-</sup> /L)         | ≤ 5             | 25                  | 50           | 80                | > 80                   | SNIRH     |
| Nitrite (mg NO <sub>2</sub> <sup>-</sup> /L)         | ≤ 0.01          | 0.02                | 0.15         | 0.3               | > 0.3                  | Rodrigues |
| Orthophosphate (mg P <sub>2</sub> O <sub>5</sub> /L) | ≤ 0.4           | 0.54                | 0.94         | 1                 | > 1                    | SNIRH     |
| Total phosphorus (mg P/L)                            | ≤ 0.2           | 0.25                | 0.4          | 0.5               | > 0.5                  | SNIRH     |
| Total coliforms (MPN/100ml)                          | ≤ 50            | 5 000               | 50 000       | > 50 000          | -                      | SNIRH     |
| Fecal coliforms (MPN/100ml)                          | ≤ 20            | 2 000               | 20 000       | > 20 000          | -                      | SNIRH     |
| Fecal Streptococci (MPN/100ml)                       | ≤ 20            | 2 000               | 20 000       | > 20 000          | -                      | SNIRH     |
| Iron (mg Fe/L)                                       | ≤ 0.5           | 1                   | 1.5          | 2                 | > 2                    | SNIRH     |
| Manganese (mg Mn/L)                                  | ≤ 0.1           | 0.25                | 0.5          | 1                 | > 1                    | SNIRH     |
| Zinc (mg Zn/L)                                       | ≤ 0.3           | 1                   | 3            | 5                 | > 5                    | SNIRH     |
| Copper (mg Cu/L)                                     | ≤ 0.05          | 0.2                 | 0.5          | 1                 | > 1                    | SNIRH     |
| Chromium (mg Cr/L)                                   | ≤ 0.05          | -                   | 0.08         | -                 | > 0.08                 | SNIRH     |
| Cadmium (mg Cd/L)                                    | ≤ 0.001         | -                   | 0.005        | -                 | > 0.005                | SNIRH     |
| Lead (mg Pb/L)                                       | ≤ 0.05          | -                   | 0.1          | -                 | > 0.1                  | SNIRH     |
| Mercury (mg Hg/L)                                    | ≤ 0.0005        | -                   | 0.001        | -                 | > 0.001                | SNIRH     |
| Arsenic (mg As/L)                                    | ≤ 0.01          | 0.05                | -            | 0.1               | > 0.1                  | SNIRH     |
| Cyanide (mg CN/L)                                    | ≤ 0.05          | -                   | 0.08         | -                 | > 0.08                 | SNIRH     |
| Phenol (mg C <sub>6</sub> H <sub>5</sub> OH/L)       | ≤ 0.001         | 0.005               | 0.01         | 0.1               | > 0.1                  | SNIRH     |
| Surfactants (LAS mg/L)                               | ≤ 0.2           | -                   | 0.5          | 0.5               | > 0.5                  | SNIRH     |

**Table S3** – Liver histopathological changes observed in *L. bocagei* and *P. duriense* were grouped into five reaction patterns. An importance factor, ranging from 1 to 3, was attributed to each change.

| Reaction pattern/Index         | Histopathological alteration       | Importance factor |
|--------------------------------|------------------------------------|-------------------|
| Circulatory disturbances index | Congestion of blood vessels        | 1                 |
| Regressive changes index       | Melanomacrophage centers           | 1                 |
|                                | Degenerative vacuolization         | 3                 |
|                                | Necrosis                           | 3                 |
|                                | Endothelial rupture                | 3                 |
|                                | Periportal edema                   | 2                 |
|                                | Necrosis of biliary epithelium     | 3                 |
| Progressive changes index      | Vacuolization hepatocytes          | 1                 |
|                                | Fibrosis                           | 3                 |
|                                | Hyperplasia of biliary epithelium  | 2                 |
|                                | Biliary duct epithelial detachment | 2                 |
| Inflammation index             | Exudate                            | 1                 |
|                                | Lymphocyte infiltration            | 2                 |

Table adapted by Bernet et al. [40]
